# Supplementary material
Source: MDPI journal article supplement (https://www.mdpi.com/2304-6732/9/7/469)
Supplement: s1 [file s1]

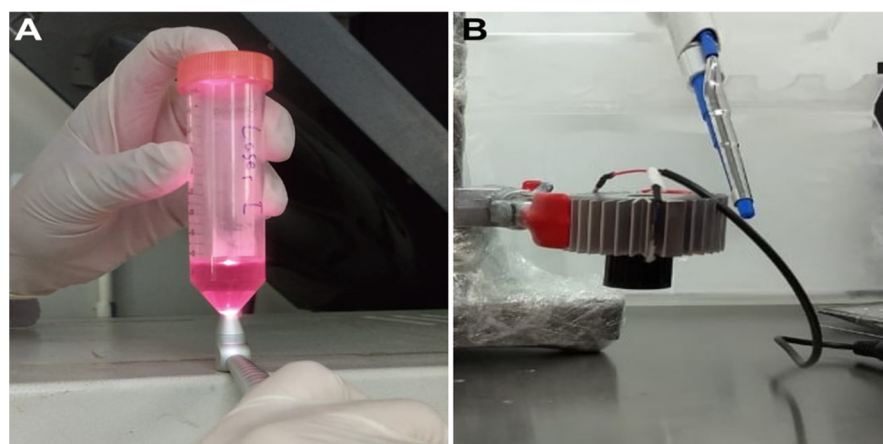

**Supplementary Figure S1.** Laser (A) and LED (B) devices positioned for irradiation.

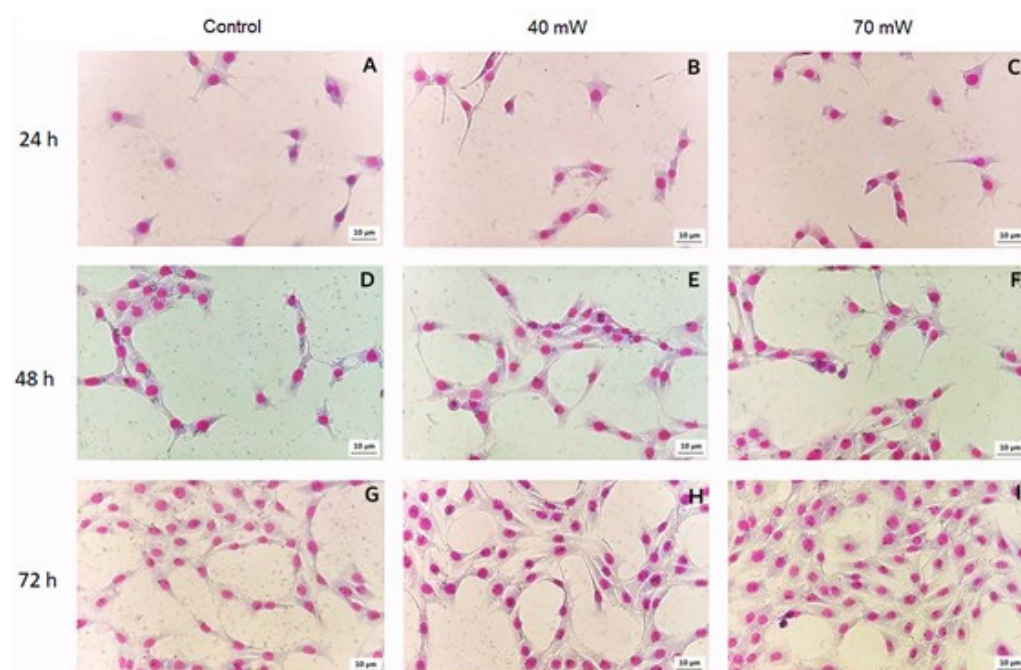

**Supplementary Figure S2.** Stained C2C12 myoblasts submitted to LLL. After 24 h: (A) Control, (B) LLL I 40 mW, (C) LLL II 70 mW; after 48 h: (D) Control, (E) LLL I 40 mW, (F) LLL II 70 mW; after 72 h: (G) Control, (H) LLL I 40 mW, (I) LLL II 70 mW.

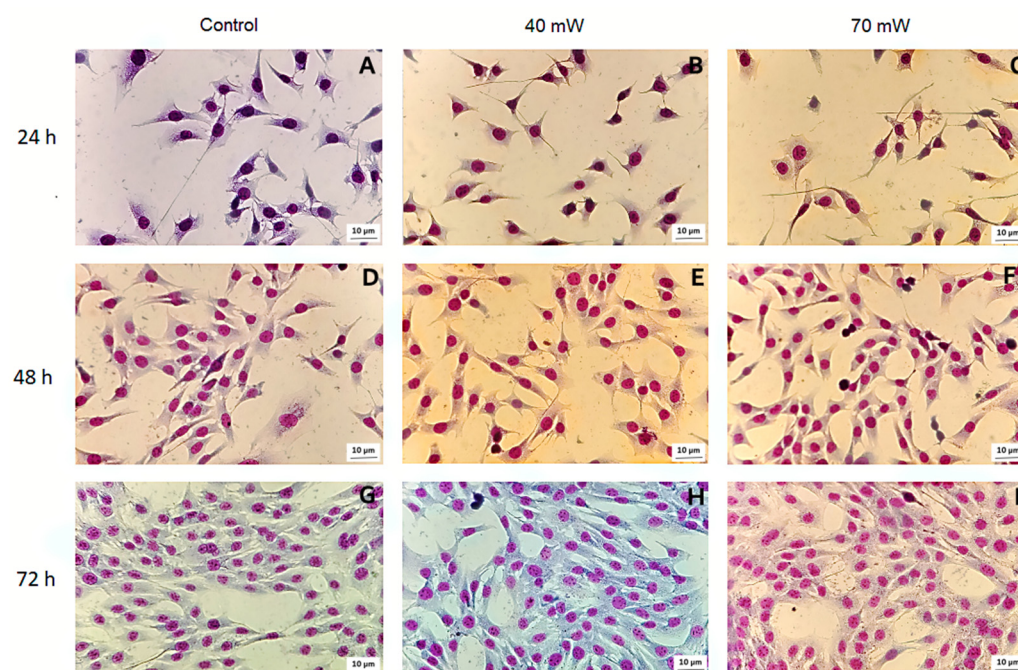

**Supplementary Figure S3.** Stained C2C12 myoblasts submitted to LED. After 24 h: (A) Control, (B) LED I 40 mW, (C) LED II 70 mW; after 48 h: (D) Control, (E) LED I 40 mW, (F) LED II 70 mW; after 72 h: (G) Control, (H) LED I 40 mW (I) LED II 70 mW.
